# Supplementary material for: Atlantic atmospheric rivers and the pulse of deep Mediterranean respiration
Source: Research Square preprint supplement (doi:10.21203/rs.3.rs-5678981/v1), 2025-01-24
Supplement: Supplementary file 1 [file 66833e8aed19eeb59c8dfd95.pdf]

Extended data Figure 5 for  
Atlantic atmospheric rivers and the pulse of deep Mediterranean respiration

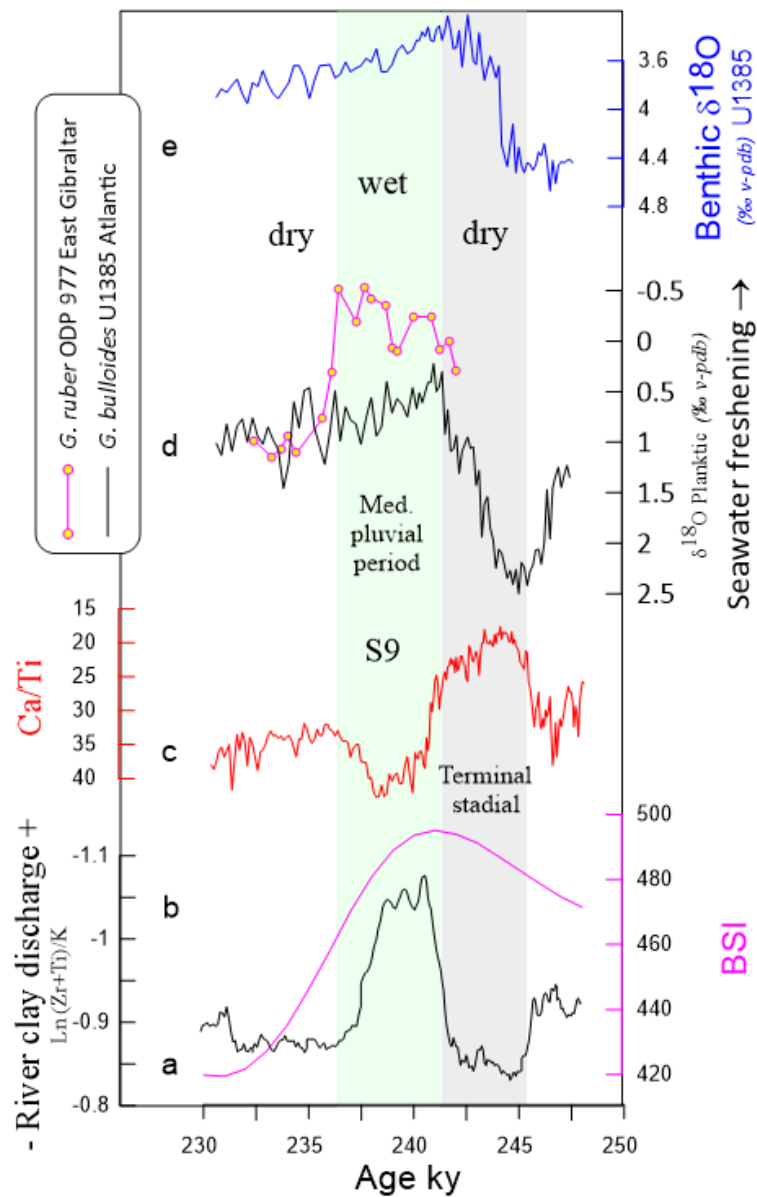

Extended data Figure 5

Surface water freshening in the westernmost Mediterranean during deposition of S9.

a, BSI at 65°N<sup>14</sup>. b, Ln (Zr+Ti)/K record of river clay discharge at site U1385. c, Ca/Ti record from site U1385. d, Sea surface water freshening events shown by *G. ruber* δ<sup>18</sup>O drops. *G. ruber* δ<sup>18</sup>O record from ODP 977 in the westernmost Mediterranean (magenta)<sup>40</sup>; *G. bulloides* δ<sup>18</sup>O from site U1385 (black) (eastern Atlantic)<sup>41</sup>; e, Benthic

12  $\delta^{18}\text{O}$  record from site U1385 (eastern Atlantic)<sup>41</sup>. The gray and green bands show the Terminal stadial event and the  
13 Mediterranean pluvial period, respectively.

14

15
